# Supplementary material for: Hierarchical Bayesian level set inversion
Source: Springer Nature journal article supplement (doi:10.1007/s11222-016-9704-8), 2016-09-21
Supplement: MOESM1 [file 11222_2016_9704_MOESM1_ESM.pdf]

# Hierarchical Bayesian Level Set Inversion: *Supplementary Figures*

Matthew M. Dunlop · Marco A. Iglesias · Andrew M. Stuart

Received: date / Accepted: date

## 1 Introduction

We provide supplementary figures for the article *Hierarchical Bayesian Level Set Inversion*.

---

Matthew M. Dunlop · Andrew M. Stuart  
Computing & Mathematical Sciences, California Institute of  
Technology, Pasadena, CA 91125, USA

Marco A. Iglesias  
School of Mathematical Sciences, University of Nottingham,  
Nottingham, NG7 2RD, UK

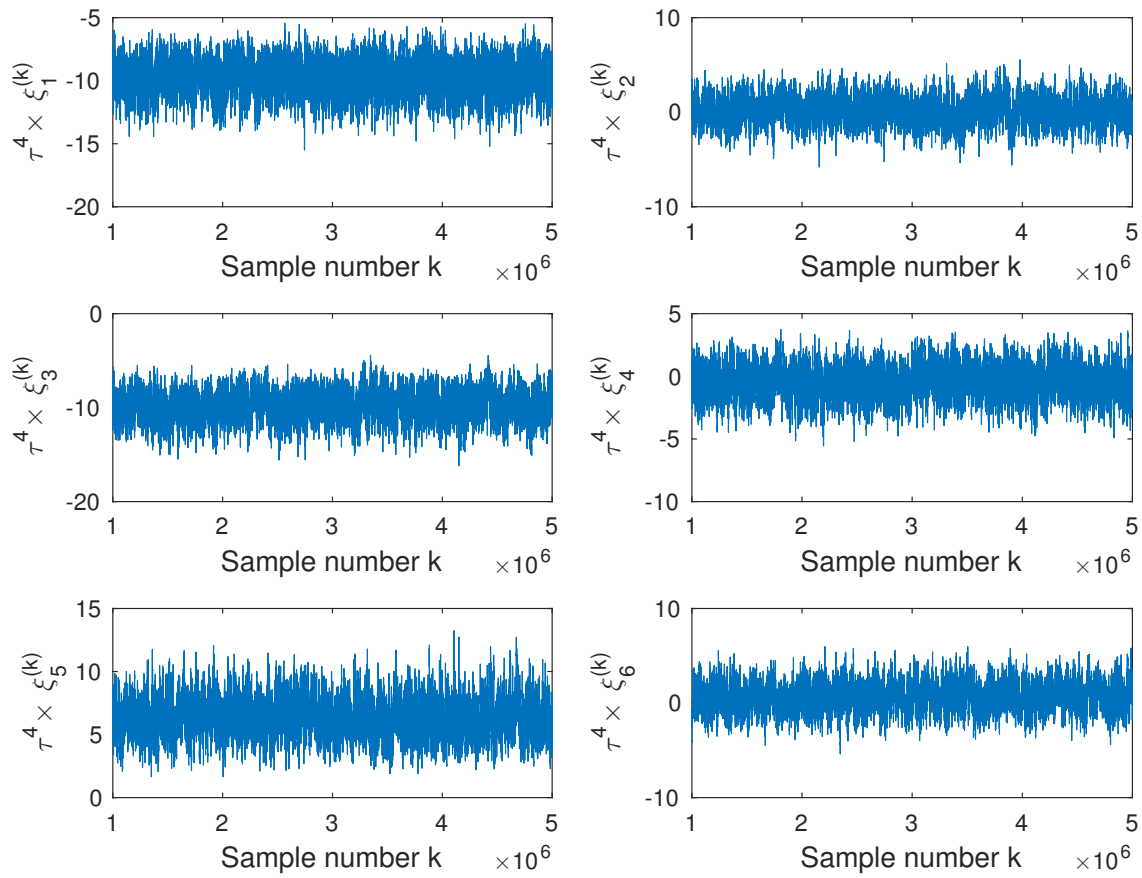

**Fig. 1** (Identity Model) Traces of the first six Fourier modes of the level set function, scaled by the trace of  $\tau^4$  to provide order 1 amplitude. The MCMC chain is initialized at  $\tau = 30$ , and the true length scale parameter is  $\tau^\dagger = 20$ .

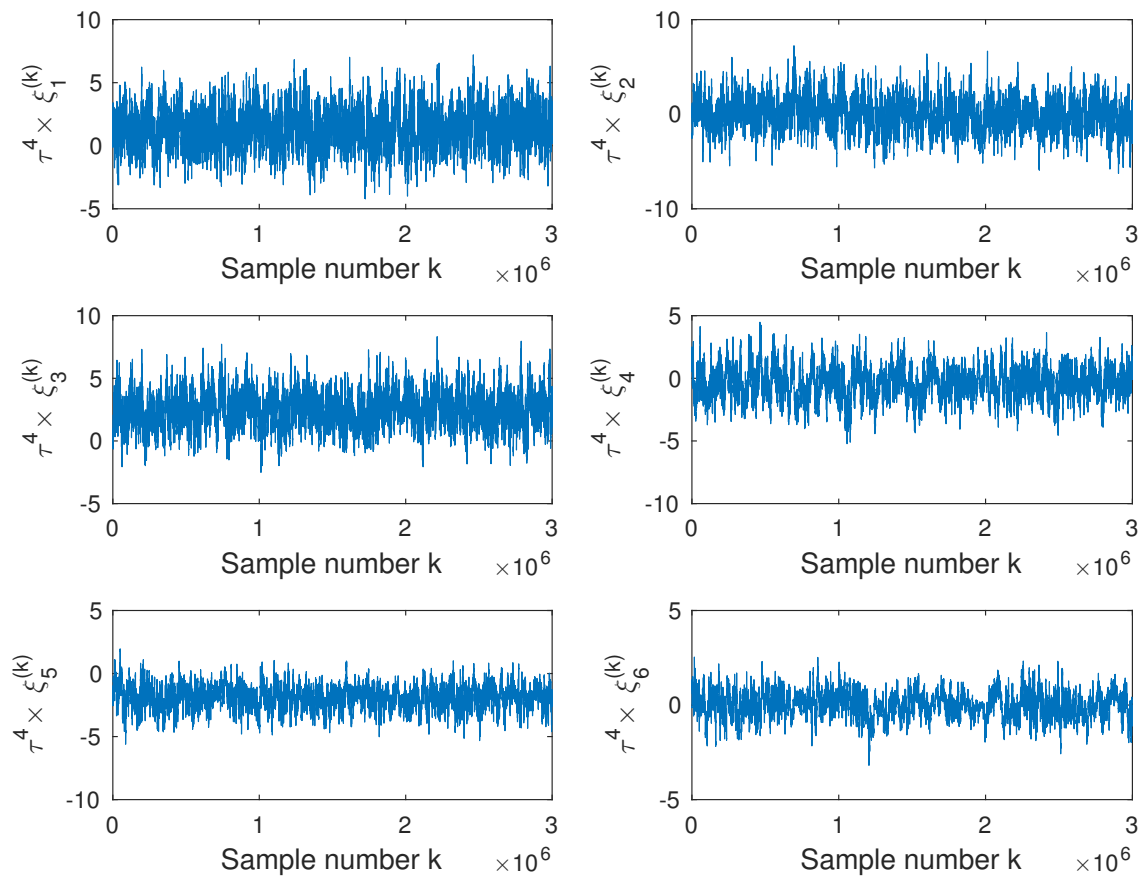

**Fig. 2** (GWF Model) Traces of the first six Fourier modes of the level set function, scaled by the trace of  $\tau^4$  to provide order 1 amplitude. The MCMC chain is initialized at  $\tau = 30$ .

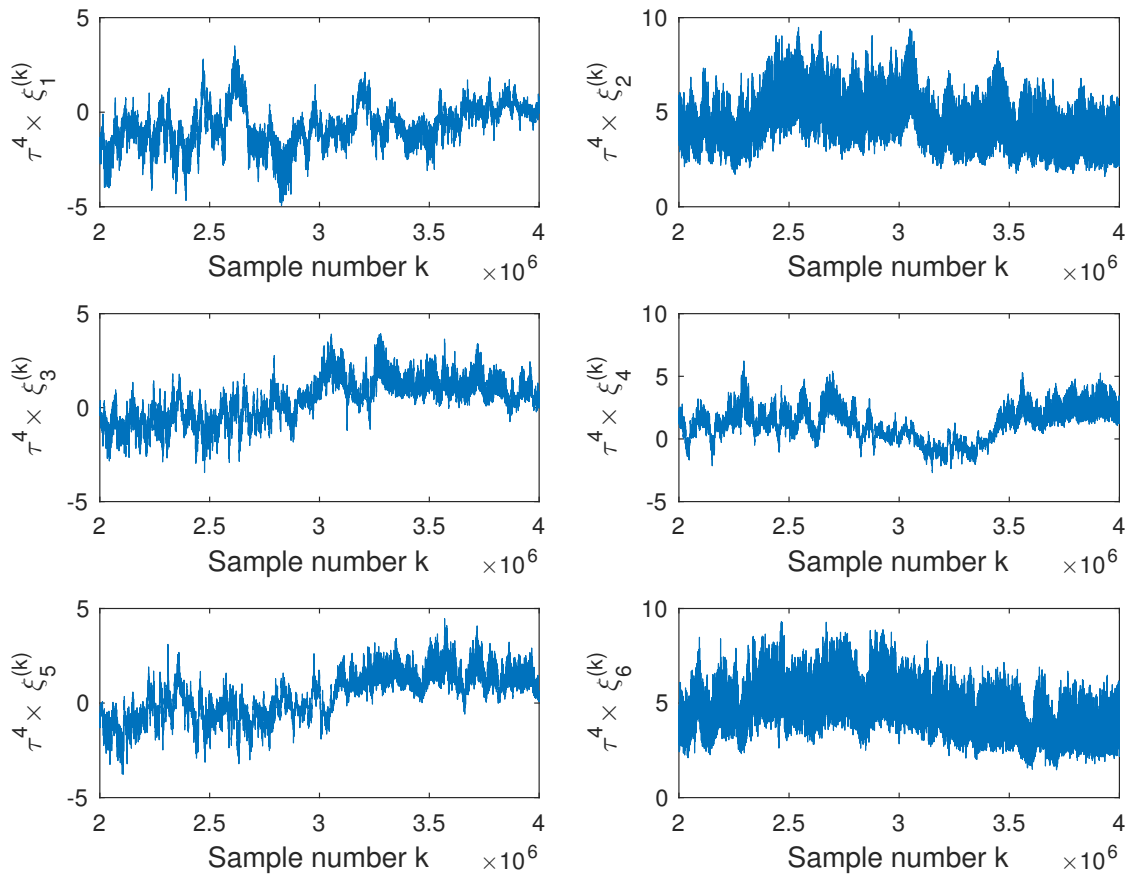

**Fig. 3** (EIT Model) Traces of the first six Fourier modes of the level set function, scaled by the trace of  $\tau^4$  to provide order 1 amplitude. The MCMC chain is initialized at  $\tau = 30$ .
